# Supplementary material
Source: MDPI journal article supplement (https://www.mdpi.com/1424-2818/14/7/527)
Supplement: s1 [file s1]

Archive with 2 entries (2 files):
- Schniebs_et_al_SupplTab1_new.pdf
- Supplementary figures.pdf
